# Supplementary material
Source: MDPI journal article supplement (https://www.mdpi.com/2410-3888/9/1/36)
Supplement: s1 [file s1]

**Table S1.** The key DEGs and DEMs of *P. vannamei* under cold stress.

| Pathway               | Genes/Metabolites    | Description                                     | log2 FC(T2/CK) | log2 FC(T4/T2) | log2 FC(T4/CK) |
|-----------------------|----------------------|-------------------------------------------------|----------------|----------------|----------------|
| Amino acid metabolism | M104T376_NEG         | L-serine                                        | -0.962606017   | 0              | 0              |
|                       | M105T328_NEG         | Glycerate/Glyceric acid                         | 0              | 0              | -3.537351536   |
|                       | M74T358_NEG          | Glycine                                         | -0.898461040   | 0              | -0.952692699   |
|                       | M118T357_NEG         | L-Threonine                                     | -1.353407689   | 0              | -1.954460693   |
|                       | M135T330_NEG         | L-threonate                                     | -1.295326495   | 0              | -1.302054740   |
|                       | M128T370_NEG         | L-pyrogutamic acid                              | 0              | 0.596884107    | 0.775056740    |
|                       | M132T344_2_POS       | Alanine betaine                                 | 0              | -0.483044274   | 0              |
|                       | M88T339_NEG          | Alanine                                         | 0              | 1.766475732    | 1.418774223    |
|                       | M169T434_POS         | L-Glutamine                                     | -2.459652441   | 3.341647945    | 0.881995504    |
|                       | M146T409_NEG         | Glutamate/Glutamic acid                         | 0              | -0.742869950   | 0              |
|                       | M116T446_POS         | D-ornithine                                     | 0.459155890    | 0              | 0              |
|                       | M175T515_POS         | Arginine                                        | -0.637661019   | 0              | -1.290435941   |
|                       | M114T304_2_NEG       | Proline                                         | 0              | 1.212791422    | 1.706985977    |
|                       | M131T383_2_NEG       | Asparagine                                      | 0              | 0.686283997    | 0              |
|                       | M206T348_POS         | 4-acetamidobutanoate                            | 0.866689421    | -0.751423202   | 0              |
|                       | ROT61431.1(AMT)      | Aminomethyl transferase                         | 0              | 0              | 1.416311402    |
|                       | ROT66029.1(SHMT1)    | Serine hydroxymethyltransferase, cytosolic      | 0              | 0              | -1.235863583   |
|                       | ROT81872.1(ASL)      | Argininosuccinate lyase                         | 0              | 0              | -1.559335374   |
|                       | ROT77699.1(Aldh3a1)  | Aldehyde dehydrogenase, dimeric NADP-preferring | 0              | -3.040157126   | 0              |
|                       | ROT78477.1(Aldh16a1) | Aldehyde dehydrogenase family 16 member A1      | 0              | -1.089878050   | -1.393638984   |
| Lipid metabolism      | M199T45_NEG          | Dodecanoic acid                                 | 0              | -0.421400477   | 0              |
|                       | M283T679_NEG         | Stearic acid                                    | 0              | 1.185139086    | 0              |

|                         |                    |                                                     |              |              |              |
|-------------------------|--------------------|-----------------------------------------------------|--------------|--------------|--------------|
| Carbohydrate metabolism | M749T147_POS       | Phosphatidylethanolamine                            | 0            | 0            | -0.167627755 |
|                         | M104T376_POS       | Choline                                             | 0            | 0            | -1.068152551 |
|                         | M204T298_POS       | Acetylcarnitine                                     | 0            | 1.390580893  | 0            |
|                         | M400T169_POS       | L-Palmitoylcarnitine                                | -1.189203211 | 0            | -1.405969717 |
|                         | ROT63220.1(FACL4)  | Long-chain-fatty-acid--CoA ligase 4                 | 0            | 0            | 3.205548911  |
|                         | ROT60937.1(LPLAT1) | Lysophospholipid acyltransferase 1                  | 0            | 0            | 1.629447887  |
|                         | ROT75541.1(ELOVL7) | Elongation of very long chain fatty acids protein 7 | 0            | 1.353792105  | 1.238642227  |
|                         | ROT71423.1(CPT2)   | Carnitine O-palmitoyltransferase 2, mitochondrial   | 0            | 0            | -1.643188979 |
|                         | M165T370_2_NEG     | D-Arabinonate/Arabinonic acid                       | -1.346771979 | -1.519635895 | -2.866407873 |
|                         | M149T300_NEG       | D-Lyxose                                            | -0.475546392 | 0            | -0.535164768 |
|                         | ROT73830.1(PGM1)   | Phosphoglucomutase-1                                | 0            | 0            | -1.338331553 |
|                         | ROT82509.1(G6PC)   | Glucose-6-phosphatase                               | 0            | 0            | -1.464092025 |
|                         | ROT60920.1(FBP1)   | Fructose-1,6-bisphosphatase 1                       | 0            | -3.365004518 | -3.258636567 |
|                         | ROT62958.1(PCK1)   | Phosphoenolpyruvate carboxykinase, cytosolic [GTP]  | 4.489384841  | 0            | 0            |
| Nucleotide metabolism   | M211T300_NEG       | D-ribose 1-phosphate                                | 0            | -1.373672238 | -1.795190468 |
|                         | M191T475_NEG       | Citrate                                             | 0            | 0            | -0.080839076 |
|                         | M61T100_POS        | Urea                                                | 0            | -1.596034142 | -1.890633305 |
|                         | M129T474_POS       | Barbiturate/Barbituric acid                         | 0            | 0            | -0.148757439 |
|                         | M136T168_POS       | 3-Hydroxypropanoate/3-hydroxyanthranilic acid       | 0            | 0.818527098  | 0            |
|                         | M113T383_NEG       | Dihydrouracil                                       | 0            | 0.702801827  | 0            |
|                         | M157T182_NEG       | L-dihydroorotate                                    | -0.713557079 | 0            | -1.359309104 |
|                         | M569T379_POS       | Xanthosine                                          | 1.418689730  | 1.217766302  | 2.636456032  |

|                |                     |                                                   |   |              |              |
|----------------|---------------------|---------------------------------------------------|---|--------------|--------------|
|                | M267T211_NEG        | Inosine                                           | 0 | 0.814250348  | 0.846113982  |
|                | M137T211_2_POS      | Hypoxanthine                                      | 0 | 0.483399199  | 0.535425471  |
|                | M251T178_NEG        | Deoxyinosine                                      | 0 | -0.619173081 | -1.324054963 |
|                | ROT68566.1(DPYS)    | Dihydropyrimidinase                               | 0 | -1.279738226 | -1.398811185 |
|                | ROT70986.1(DPYD)    | Dihydropyrimidine dehydrogenase                   | 0 | 0            | 1.120657214  |
|                | ROT62010.1(NT5E)    | 5'-Nucleotidase                                   | 0 | 0            | 1.294674486  |
|                | MSTRG.3682(HPRT1)   | Hypoxanthine-guanine<br>phosphoribosyltransferase | 0 | -1.819147701 | -1.958813862 |
|                | ROT81136.1(HPRT1)   | Hypoxanthine-guanine<br>phosphoribosyltransferase | 0 | -1.170513496 | -1.672736928 |
| Antioxidation  | ROT68062.1(GPX)     | Glutathione peroxidase                            | 0 | -2.799747589 | -1.671245701 |
|                | ROT61838.1(Trx-2)   | Thioredoxin, mitochondrial                        | 0 | 0            | -1.740866530 |
|                | ROT65492.1(Txndc12) | Thioredoxin domain-containing protein 12          | 0 | 0            | -1.149943188 |
| Immunity       | ROT81705.1(LYZ)     | Lysozyme                                          | 0 | -2.152693976 | -2.033366191 |
|                | ROT63690.1(CTL2)    | C-type lectin 2                                   | 0 | -1.105598270 | 0            |
|                | MSTRG.21167(CTL2)   | C-type lectin 2                                   | 0 | -1.741861301 | 0            |
| Osmoregulation | ROT72182.1(ATP2C1)  | Calcium-transporting ATPase type 2C member 1      | 0 | 1.757938577  | 1.560783447  |
|                | ROT61630.1(ATP2B3)  | plasma membrane calcium-transporting ATPase<br>2  | 0 | 0            | 1.618198830  |
|                | ROT61631.1(ATP2B3)  | Plasma membrane calcium-transporting ATPase<br>2  | 0 | 0            | 1.769777042  |
|                | ROT75121.1(SLO)     | Calcium-activated potassium channel               | 0 | 0            | -1.053295585 |

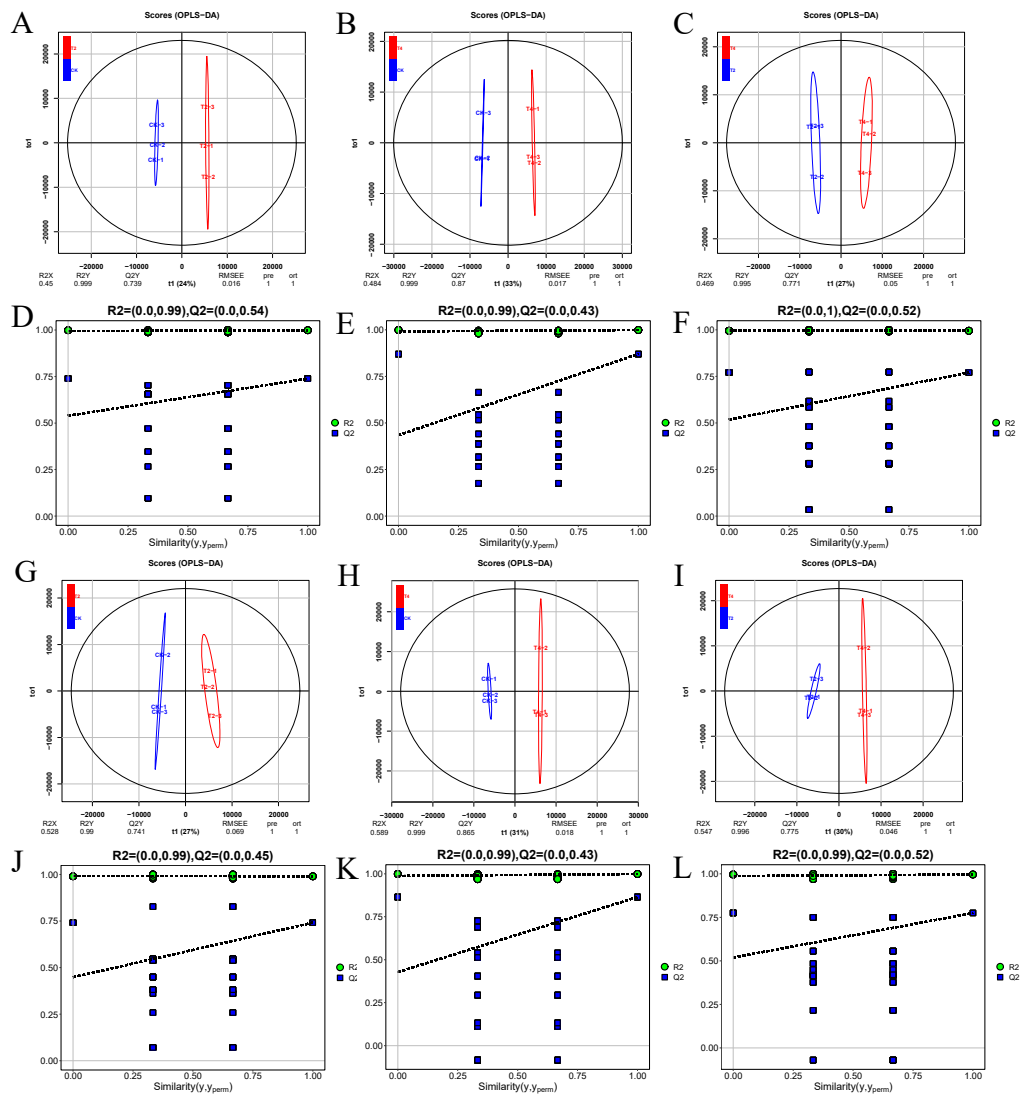

**Figure. S1** OPLS-DA score plots and OPLS-DA permutation test.

Positive OPLS-DA score plots of CK vs T2 (A), CK vs T4 (B), and T2 vs T4 (C) and permutation tests of CK vs T2 (D), CK vs T4 (E), T2 vs T4 (F); Negative OPLS-DA score plots of CK vs T2 (G), CK vs T4 (H) and T2 vs T4 (I) and permutation tests of CK vs T2 (J), CK vs T4 (K), T2 vs T4 (L).
